# Supplementary material for: The transcription factor FOXN3 inhibits cell proliferation by downregulating E2F5 expression in hepatocellular carcinoma cells
Source: PubMed Central journal article supplement (PMC5190042; doi:10.18632/oncotarget.9780), 2016-06-02
Supplement: oncotarget-07-43534-s001.pdf [file oncotarget-07-43534-s001.pdf]

## The transcription factor FOXN3 inhibits cell proliferation by downregulating E2F5 expression in hepatocellular carcinoma cells

### Supplementary Materials

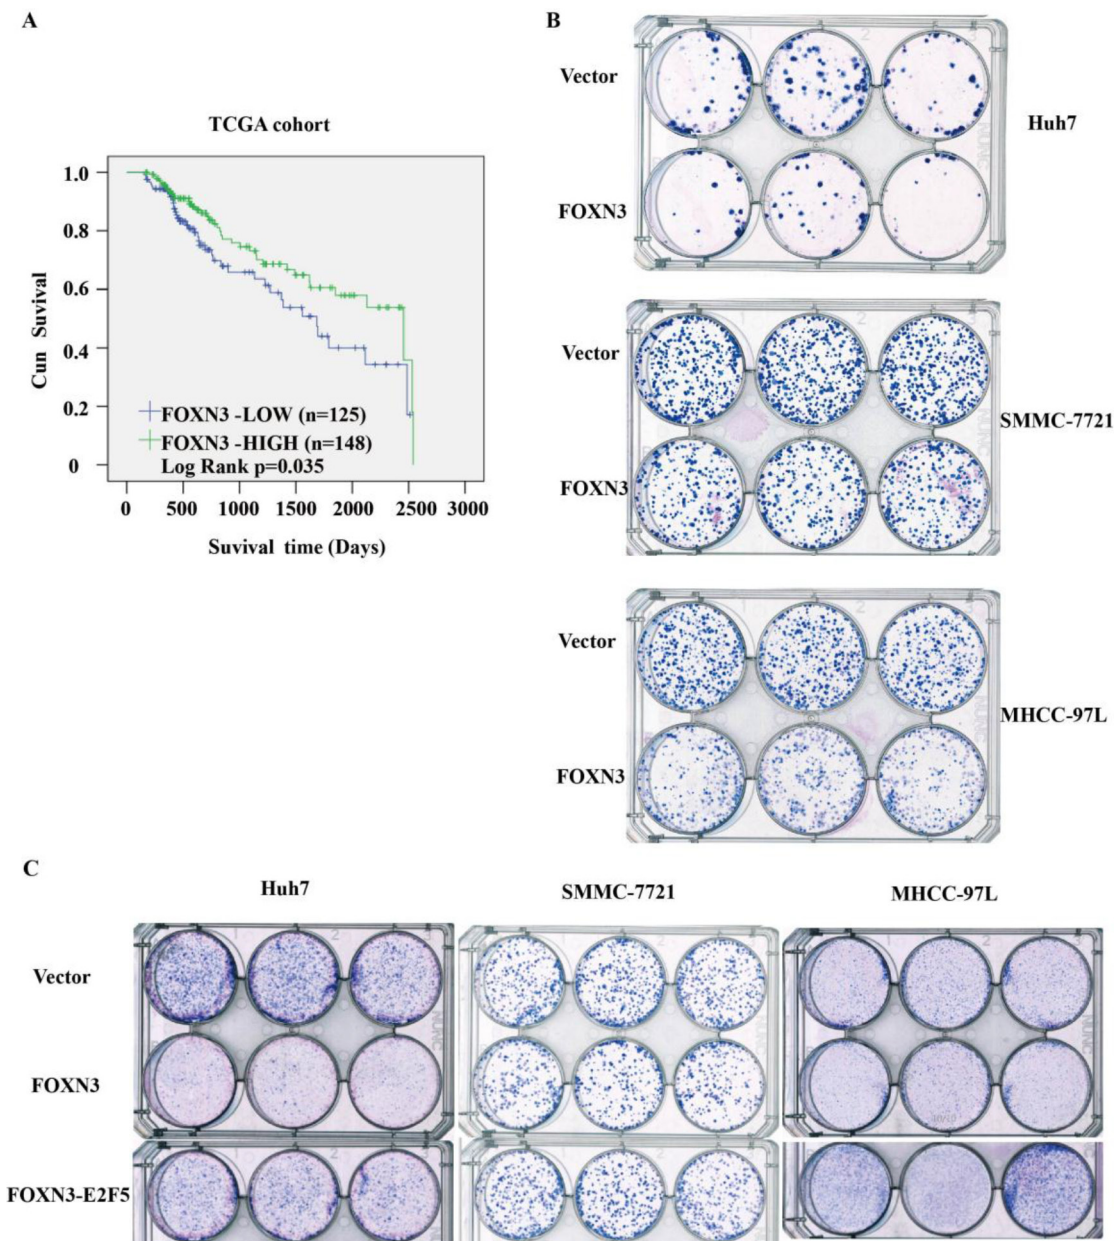

**Supplementary Figure S1: FOXN3 plays an antiproliferative role in HCC.** (A) Kaplan-Meier analysis of the correlation between FOXN3 expression and overall survival in TCGA cohort. Log-rank test was used to determine statistical. (B) Colony formation was performed in HCC cells stably transfected with FOXN3 or the control. (C) Colony formation was performed in HCC cells reintroduced of E2F5 or the control.

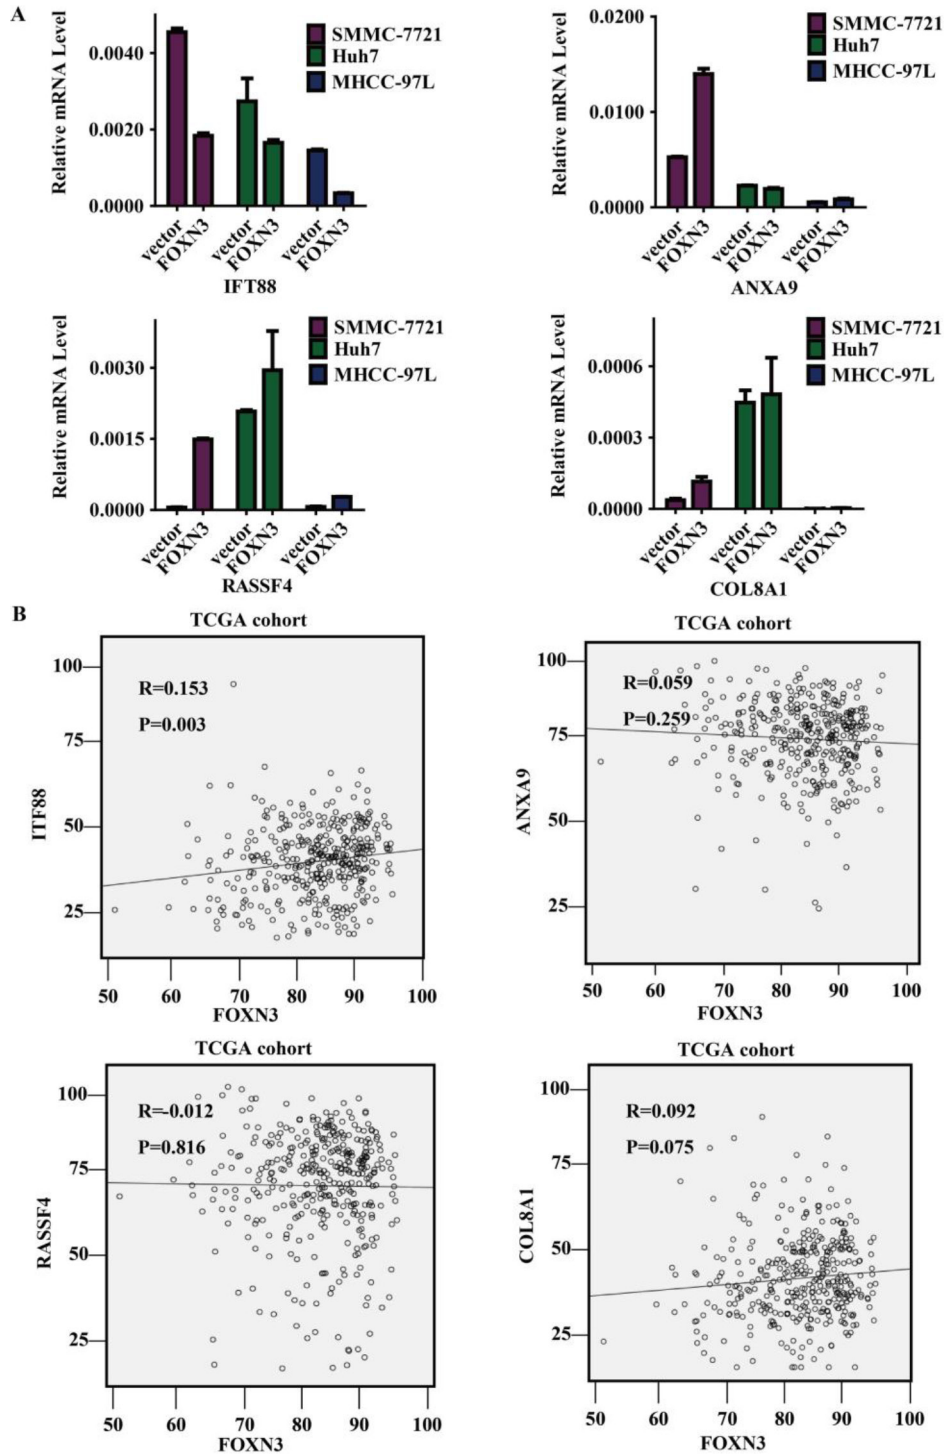

**Supplementary Figure S2:** We detected other gene chosen from Microarray analysis as the target of FOXN3 except E2F5. (A) qRT-PCR analysis of the mRNA levels for the indicated gene in HCC cell lines overexpressing FOXN3. (B) Analysis the correlation between FOXN3 and the indicated genes in 373 HCC tissues using data from TCGA.

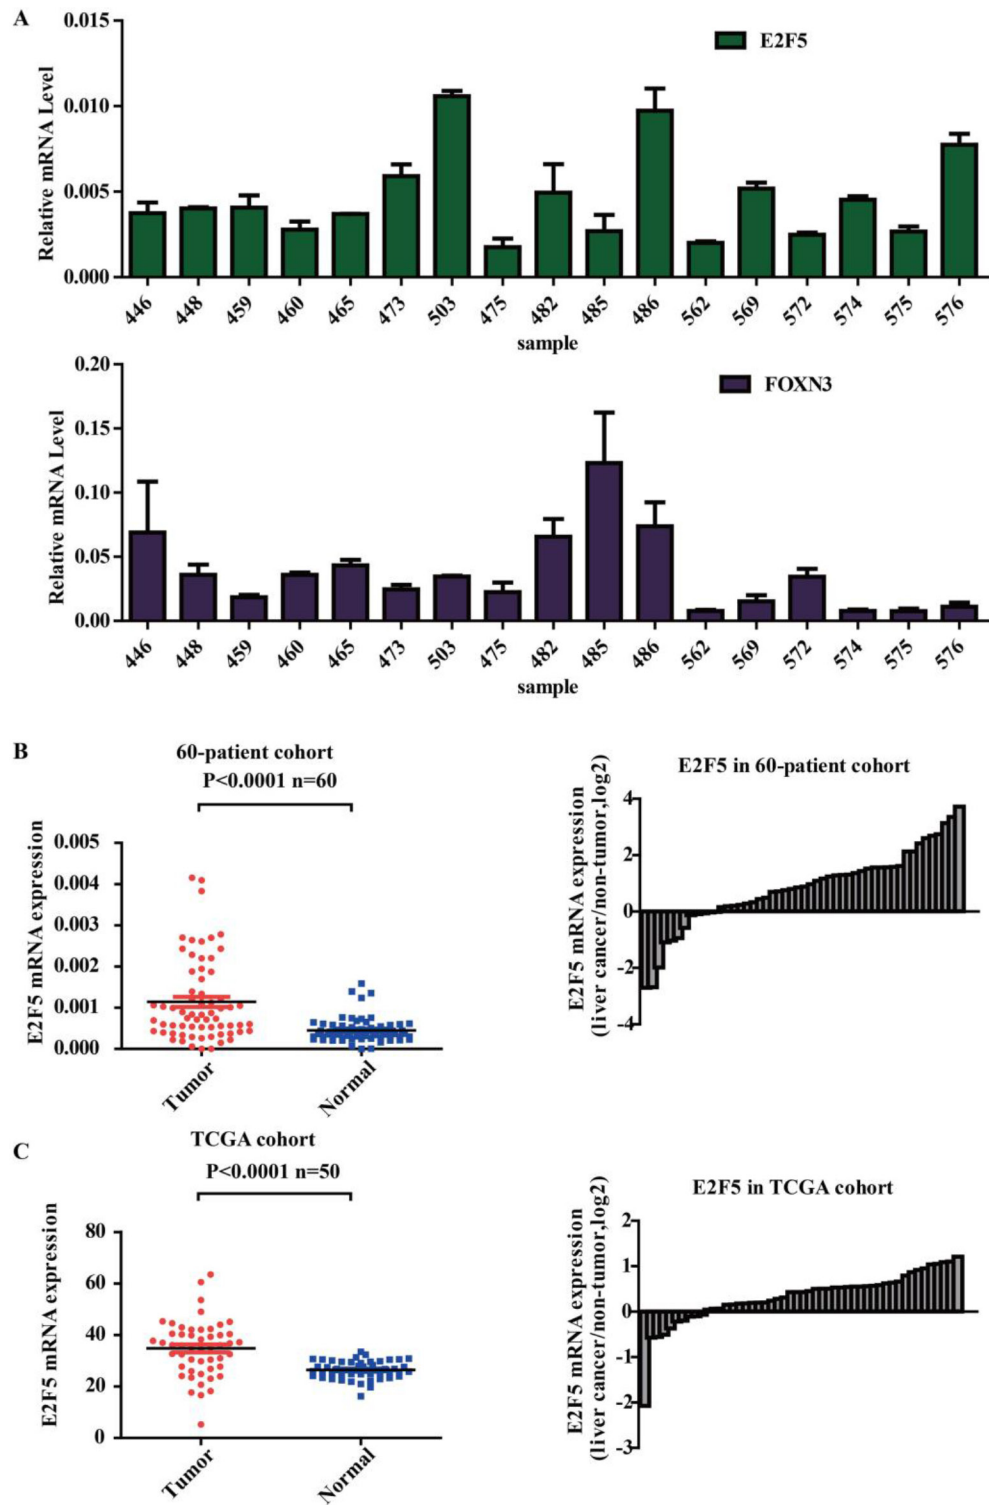

**Supplementary Figure S3: The expression of E2F5 was upregulated in HCC tissues compared with the matched non-tumorous liver tissues and partly negative correlated with FOXN3 in HCC tissues. (A) qRT-PCR analysis of the mRNA levels for E2F5 and FOXN3 in several HCC tissues. (B) qRT-PCR analysis of the mRNA expression of E2F5 in 60-patient cohort. (C) Expression levels of E2F5 in TCGA cohort.**

**Supplementary Table S1: Primer for qRT-PCR and CHIP**

| Name     | Primer Sequence               |
|----------|-------------------------------|
| FOXN3-F  | 5'-TCTGACATGCCCTACGATGC-3'    |
| FOXN3 -R | 5'-CTATGCACCACAACGACCCT-3'    |
| E2F5-F   | 5'-TCTTCAGCAGGATCTATTAGTGG-3' |
| E2F5-R   | 5'-TGTAGTCATCTGCCGGGTA -3'    |
| IFT88-F  | 5'-GTGCGTGGAAGTGGTAAAAG-3'    |
| IFT88 -R | 5'-AGGGCTGAGAGATTGGTTGC-3'    |
| ANXA9-F  | 5'-CTCGGCCTAGCTTCGGTGAT-3     |
| ANXA9-R  | 5'-GACTGGCAATCCCCTTTCAC-3'    |
| RASSF4-F | 5'-AGTCCATTGAGAAGTCGGAGC-3    |
| RASSF4-R | 5'-ATGGCTCCTTTAGAGGGCAG-3     |
| COL8A1-F | 5'-TATAAATGTGATGGCTGTGCTGC-3  |
| COL8A1-R | 5'-CAGCGGCTTGATCCCATAGT-3     |
| CHIP-F   | 5'- GCCTTCTTGATAGGTTGTT -3    |
| CHIP-R   | 5'- ACTAGTAAAGCTGAACACACCA -3 |

F, forward primer; R, reverse primer; RT, reverse-transcription primer.

**Supplementary Table S2: Primer for clone**

| Name              | Primer Sequence                                                                                        |
|-------------------|--------------------------------------------------------------------------------------------------------|
| FOXN3-F           | 5'- TACACGCGTATGGGTCCAGTCATGCCTCC -3'                                                                  |
| FOXN3 -R          | 5'- CGCGCGAATTCTTAATTTTTTGTGGTTTCCT -3'                                                                |
| E2F5-F            | 5'- TATATTAGGATCCATGGCGGCGGCAGAGCCCGCGA -3'                                                            |
| E2F5-R            | 5'- GGCCGGAATTCCTAATAATTTAGTATCTGG -3'                                                                 |
| E2F5-Pro2300-F    | 5'- CGACGCGTCGATCGTGAAGATTGAGCCCTC -3'                                                                 |
| E2F5-Pro2000-F    | 5'- CGACGCGTGTGTTATTAATTCCTGTC -3'                                                                     |
| E2F5-Pro1800-F    | 5'- CGACGCGTATGGTTGTATCAACTGAA -3                                                                      |
| E2F5-Pro1650-F    | 5'- CGACGCGTCAGTTTACTAGTTAATG -3'                                                                      |
| E2F5-Pro1450-F    | 5'- CGACGCGTTGCAGTGGTGGCATCTCG -3                                                                      |
| E2F5-Pro1250-F    | 5'- CGACGCGTCTGCCTCGGCCTCCCAA -3                                                                       |
| E2F5-Pro-mutant-F | 5'- CGACGCGTATGGTTGTATCAACTGAATTTTTTCATGTTTTACTTCAGATTTT<br>CAATTTAAGTCTCGCTCACAACTTGATTAATAAAGGTTA -3 |
| E2F5-Pro-R        | 5'- GGAAGATCTAGATCTGAGTAAAAGAAAG -3                                                                    |

F, forward primer; R, reverse primer; RT, reverse-transcription primer
